# Supplementary material
Source: PubMed Central journal article supplement (PMC3368507)
Supplement: NIHMS381585-supplement-supplement_1.pdf [file NIHMS381585-supplement-supplement_1.pdf]

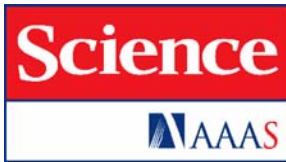

## Supporting Online Material for

### **Role for piRNAs and Noncoding RNA in de Novo DNA Methylation of the Imprinted Mouse *Rasgrf1* Locus**

Toshiaki Watanabe,\* Shin-ichi Tomizawa, Kohzoh Mitsuya, Yasushi Totoki, Yasuhiro Yamamoto, Satomi Kuramochi-Miyagawa, Naoko Iida, Yuko Hoki, Patrick J. Murphy, Atsushi Toyoda, Kengo Gotoh, Hitoshi Hiura, Takahiro Arima, Asao Fujiyama, Takashi Sado, Tatsuhiro Shibata, Toru Nakano, Haifan Lin, Kenji Ichiyanagi, Paul D. Soloway, Hiroyuki Sasaki\*

\*To whom correspondence should be addressed. E-mail:  
toshwatatoshiakiwatanabe@gmail.com (T.W.); hasaki@bioreg.kyushu-u.ac.jp (H.S.)

Published 13 May 2011, *Science* **332**, 848 (2011)  
DOI: 10.1126/science.1203919

#### **This PDF file includes**

Materials and Methods  
SOM Text  
Figs. S1 to S10  
Tables S1 to S3  
References

## **Supporting Online Material**

### **Materials and Methods**

#### **Isolation of spermatogonia**

Spermatogonia were isolated from postnatal testes at 6-11 days post partum (dpp) of 3-8 individuals by fluorescence activated cell sorting (FACS) using Ep-CAM immunofluorescence (S1) or using fluorescence from a Oct-4/EGFP transgene (S2). Postnatal testes were treated with 0.25% trypsin/1 mM EDTA for 10 min, and testicular cells were suspended in Dulbecco's modified Eagle medium (DMEM) supplemented with 10% fetal calf serum (FCS). After filtration using a cell strainer (40  $\mu$ m, BD Falcon), testicular cells were collected by centrifuge. For Ep-CAM immunofluorescence, testicular cells were incubated with rat monoclonal anti-Ep-CAM antibody (G8.8, Santa Cruz), and then with Alexa Fluor 488 anti-rat IgG (Invitrogen). Fluorescence-positive cells were collected by FACS.

#### **Isolation of fetal germ cells and somatic cells**

Testes were collected from C57BL/6J fetuses at 16.5 dpc and were treated with 0.25% trypsin /1 mM EDTA. The cells were suspended in DMEM supplemented with 10% FCS. After filtration using a cell strainer (40  $\mu$ m, BD Falcon), cells were cultured on a tissue culture dish for 3 hr. Attached cells (somatic cells) and floating cells (germ cells or prospermatogonia) were respectively collected.

#### **Bisulfite Sequencing**

Bisulfite treatment of DNA was performed as described previously (S3). In brief, DNA

was denatured with NaOH and then treated with 9 M sodium bisulfite from BisulFAST kit (TOYOBO). DNA was collected using a microcolumn, desulphonated and eluted using EZ DNA methylation kit (Zymo Research). The primer sequences used are listed below. The amount of DNA used for PCR was 0.65 ng for oocytes and embryonic male germ cells, 1.2 ng for blastocysts, and 7.5-25 ng for other tissues and cells.

### **Small RNA library preparation**

To prepare small RNA libraries, 5-10 testes were collected from wild-type and mutant fetuses at 16.5 dpc and total RNA was extracted using ISOGEN (Nippon Gene). Because all mutant mice had a similar genetic background (largely C57BL/6J, with some genomic portions from 129), we used *MitoPLD*<sup>+/+</sup> as a wild-type control. Digital Gene Expression for Small RNA Sample Prep Kit (Illumina) was used for library construction, and the clones were sequenced using Genome Analyzer II (Illumina).

### **Analysis of small RNAs**

After removing the linker sequences, 20-33-nt small RNA sequences were extracted and mapped to the genome (mm9) using SeqMap (S4), and only perfectly matched sequences were extracted. Presumptive degradation products from abundant RNAs (rRNA, tRNA, snoRNA, snRNA, snoRNA, scRNA and srpRNA) were removed as described in (S5), and the remaining reads were grouped and counted according to their length (length distribution analysis, Fig. 2A). To compare small RNA levels between the samples, small RNA counts were normalized by using total miRNA counts as a reference. To identify small RNAs mapping to the *Rasgrf1* DMR (mm9 chr9: 89769659-89779158) (Fig. 3A,B), all small RNA sequences were examined allowing up

to two nucleotide differences (where the number of indel should not exceed one). Small RNA hits were counted for every 100-nt window and normalized by the miRNA counts. To know the exact origin of small RNAs that had a sequence homology to the *Rasgrfl* RMER4B copy, they were again mapped to the genome with a perfect match criterion (table S3). The numbers of the small RNAs mapping to the *Rasgrfl* RMER4B copy, with or without mismatches, in wild-type and mutants are summarized in table S1. For identification of ping-pong sites in other RMER4B copies, unique sequence small RNAs mapping to any RMER4B copies were first identified, and all small RNAs were examined for homology to these RMER4B copies allowing two mismatches including indels. If the small RNAs identified in the second screen were on the opposite strand of the unique small RNA identified in the first screen, and if their first ten nucleotides were complementary each other, they were regarded as a ping-pong pair (fig. S6).

#### **RT-PCR, 5'RACE and modified 5'RACE**

Total RNA was isolated from various tissues and cells using ISOGEN (Nippon Gene). Otherwise noted, C57BL/6J mice were used to prepare tissues and cells. For RT-PCR and qPCR, total RNA of 100 ng – 1 µg was treated with DNase I and then reverse transcribed. The mRNA level of *Oct4* or *beta-actin* was used for normalization. The 5' end of pit-RNA was determined by 5'RACE using GeneRacer (Invitrogen) according to the manufacture's instruction. Total RNA of 5 µg from 16.5-dpc fetal testes was used. For modified 5'RACE, total RNA of 5 µg from 16.5-dpc fetal testes was directly ligated to the linker RNA supplied in GeneRacer. After reverse transcription, PCR was performed using a gene-specific primer and a linker primer. The reaction conditions were as described in the manufacture's instruction of GeneRacer, except that the calf

intestine alkaline phosphatase treatment and tobacco acid pyrophosphatase treatment were omitted. The sequences of the primers used are listed below.

## Supplementary Text

### Characterization of pit-RNA at the *Rasgrfl* DMR

To examine the spacial and temporal regulation of pit-RNA, we performed qPCR on total RNAs prepared from several tissues (fig. S5A). We did not detect pit-RNA in five 3-dpp somatic tissues that we examined. During testis development, pit-RNA was expressed at 12.5 dpc and 16.5 dpc but undetectable at 2 dpp or adult stage. DNA methylation of the *Rasgrfl* DMR during testis development was previously reported (S6): it is very low (5-10 %) in primordial germ cells at 12.5 dpc, and *de novo* methylation proceeds in prospermatogonia to an almost full methylation (80-100 %) state by 18.5 dpc. The expression pattern of pit-RNA is consistent with the mode of *de novo* methylation of the *Rasgrfl* DMR.

The pit-RNA transcript had a single transcription start site within a direct repeat essential for *Rasgrfl* imprinting (S7) (Fig. 4D). A series of strand-specific RT-PCR assays revealed that pit-RNA is transcribed until at least 2-kbp downstream of the direct repeat (fig. S5B). We were not able to determine the exact 3' end of pit-RNA due to the repeat-rich nature of the region. An allelic expression analysis using a polymorphism between C57BL6/J and JF1 strains revealed that pit-RNA expression is not imprinted in 16.5-dpc testes (fig. S5C). The biallelic expression of pit-RNA is consistent with its *cis*-acting role in *de novo* methylation since both alleles of the *Rasgrfl* DMR should be methylated in the male germline for this gene to be imprinted. We also examined the imprinting status of the chr7 piRNA cluster (a presumptive precursor for the primary piRNAs), but its expression was biallelic in 16.5-dpc testes (fig. S5D).

### **Do other copies of RMER4B also require the piRNA pathway for methylation?**

To know whether the PIWI-piRNA-dependent methylation is common to all RMER4B copies, we first searched for copies that are potentially targeted by piRNAs other than the one in the *Rasgrfl* DMR. By applying the method that we used to find the ping-pong pairs in the *Rasgrfl* DMR, we identified two other copies that have a ping-pong signature sites (fig. S6). These sites were potentially targeted by the piRNAs from the chr7 piRNA cluster with some mismatches.

We then examined the methylation status of the RMER4B copies homologous to the *Rasgrfl* RMER4B copy, including one of the two having a ping-pong signature, in *MitoPLD*<sup>-/-</sup> spermatogonia. In all seven RMER4B copies that we examined, methylation was fully established in the mutant spermatogonia (fig. S7), suggesting that PIWI-piRNA is not essential. The results suggest that the copy in the *Rasgrfl* DMR is unique among the RMER4B copies in its requirement of the piRNA pathway for methylation.

### **Are other retrotransposons differentially methylated in somatic tissues?**

Our study shows that the piRNA pathway is involved in DNA methylation of the *Rasgrfl* DMR in the male germline, which is inherited by the offspring as the paternal-specific methylation. Previous studies showed that L1Md and some IAP retrotransposons become methylated in the male germline in a PIWI-piRNA-dependent manner (S8, S9). By contrast, the bulk of L1 retrotransposons stays hypomethylated in oocytes (S10). Then, are these retrotransposons differentially methylated in the offspring? A number of studies showed that these retrotransposons are generally highly methylated in somatic cells. We examined the methylation status of individual L1Md

and IAP copies in adult liver genomic DNA and found that they are almost completely methylated (fig. S8). Furthermore, we examined the allelic methylation status of two IAP and seven RMER4B copies, including the one in the chr7 piRNA cluster, using strain-specific polymorphisms. Differential methylation was not observed at any of these copies in adult liver DNA (fig. S9A,B). These results together indicate that most copies of these retrotransposons are not differentially methylated in the offspring.

### **The *Rasgrf1* RMER4B copy is resistant to the epigenetic reprogramming in early development**

The above studies showed that the RMER4B copy at the *Rasgrf1* DMR is unique among the RMER4B copies in that it is methylated in a parental-origin-specific manner in somatic cells. It was shown that, during early development, the bulk of L1 and IAP retrotransposons are substantially demethylated, and then become remethylated (S10, S11). Do RMER4B retrotransposons undergo similar changes during development? If so, does the *Rasgrf1* RMER4B copy follow that fate, or escape from these changes?

We designed a primer pair that amplifies the bulk of RMER4B copies (and some RMER4A copies, see legend for fig. S10), and analyzed the methylation changes during development by bisulfite sequencing (fig. S10). The RMER4B retrotransposons were highly methylated in spermatogonia and sperm (89.5% and 86.6% methylation, respectively), whereas they were hypomethylated in oocytes (25.3%). At the blastocyst stage, the bulk of RMER4B retrotransposons showed only 17.0% methylation, suggesting that the paternal RMER4B copies are demethylated during preimplantation development. This is in contrast to what is observed for the RMER4B copy in the *Rasgrf1* DMR, which is protected from this demethylation (S3). In 12.5-dpc whole



embryos, the bulk RMER4B was highly methylated (76.2%) and stayed at a similar level in adult tissues such as the liver (86.4%). This high level of methylation was observed on both parental alleles (fig. S9). Thus most RMER4B copies are subject to the global *de novo* methylation occurring in early postimplantation development. Again, the *Rasgrf1* RMER4B copy is unique in that its maternal allele is protected from this strong wave of methylation.

Together, these results indicate that not only the piRNA-dependent *de novo* methylation during male germ cell development, but also the resistance to the epigenetic reprogramming during early development, is critical for the differential methylation and imprinting of *Rasgrf1*. It is noteworthy that the postfertilization processes may be also regulated by the direct repeat (S7, S12).

### Supplementary Figure Legend

**fig. S1** DNA methylation status of the *H19* and *Dlk1-Gtl2* DMRs in *Mili*<sup>-/-</sup> and *Miwi2*<sup>-/-</sup> spermatogonia. DNA was isolated from spermatogonia from 9-11-dpp testes and analyzed by bisulfite sequencing. The portion of the *H19* DMR examined here is located between regions E and F in fig. S2 (top). The portion of the *Dlk1-Gtl2* DMR examined is located between regions B and C in fig. S2 (middle). *Mili*<sup>+/-</sup> spermatogonia and 12.5-dpc whole embryos are the controls.

**fig. S2** DNA methylation status of the *H19*, *Dlk1-Gtl2* and *Gpr1-Zdbf2* DMRs in *MitoPLD*<sup>-/-</sup> spermatogonia. Colored bars indicate the regions differentially methylated between oocytes and sperm (gametic DMRs) (S13). The green bars marked as gametic DMR contain regions critical for imprinting. DNA from 6-8-dpp spermatogonia was analyzed by bisulfite sequencing. Repeat sequences identified by RepeatMasker are shown by colored boxes: green, LINE; purple, SINE; white, simple repeat; gray, LTR; light gray, DNA transposon. CpG sites are indicated by short vertical bars. The results obtained with wild-type spermatogonia and 12.5-dpc whole embryos are also shown.

**fig. S3** The Chr7 piRNA cluster generates RMER4B piRNAs. (A) LTR, LINE and SINE retrotransposons identified by RepeatMasker are shown at the top. Those on the plus strand are shown by blue boxes and those on the minus strand are shown by red boxes. Small RNAs uniquely mapping to this cluster are counted in 100-nt windows and the numbers are shown in the graph. An enlarged view of the region containing the RMER4B copy is shown at the bottom. (B) Alignment of the sequences of the regions around sites 1 and 2 (see Fig. 3B) of the RMER4B copy from the *Rasgrf1* DMR and the

corresponding region of the copy from the chr7 piRNA cluster. The red horizontal bar indicates the sequence of the most abundant chr7-derived piRNA that targets pit-RNA.

**fig. S4** A model for piRNA-directed methylation of the *Rasgrf1* DMR. The piRNAs generated from the chr7 piRNA cluster are bound by MILI and/or MIWI2. The MILI- and/or MIWI2-piRNA complexes then target the nascent pit-RNA. DNMT3a and DNMT3b respectively form a *de novo* DNA methyltransferase complex with DNMT3L, which is responsible for methylation of the *Rasgrf1* DMR (S6, S14). The complexes are recruited to the DMR by a yet unknown mechanism.

**fig. S5** Characterization of pit-RNA at the *Rasgrf1* DMR. (A) Fetal testis-specific expression of pit-RNA. qPCR was performed with total RNAs from indicated tissues. Somatic tissues were from 3-dpp male mice. The expression level of pit-RNA was normalized using that of beta-actin. (B) Structure of pit-RNA. A series of strand-specific RT-PCR was done with total RNA from 16.5-dpc testes. The results shown at the bottom are for pit-RNA and those at the top are for RNA of the opposite strand. AK029869 is a non-coding EST from adult testes, which was also detected in the fetal testes. (C) Biallelic expression of pit-RNA. The sequences of the pit-RNA transcripts from three 16.5-dpc fetuses from C57BL/6J (B6) females crossed with JF1 males were determined. Polymorphisms at chr9: 89774398 and 89774368 (mm9) were used to distinguish between the B6- and JF1-derived pit-RNA sequences. Numbers of the RT-PCR products from the respective alleles are shown. (D) Allelic expression status of the RNA in the chr7 piRNA cluster. Sequence traces of the RT-PCR products generated from 16.5-dpc testis RNA with primers flanking the polymorphism rs46357180 at chr7:

6,552,735 (highlighted in yellow) (mm9). Control samples were from inbred FVB/n mice (FVB) [A], B6 mice [B] or a 1:1 mixture of the two inbred samples to simulate a scenario where both alleles were equally expressed [C]. The F1 test progeny were from B6 mothers and FVB fathers [D], or from the reciprocal cross [E].

**fig. S6** Other RMER4B copies showing a signature of the ping-pong cycle. piRNA sequences are represented by bars and are colored according to the number of reads obtained. Plus strand hits are shown above the sequence and minus strand hits below it. Sequence mismatches are indicated by black portions of the bars. Unique hit piRNAs are indicated. Ten-nt overlaps characteristic of a ping-pong pair are also indicated.

**fig. S7** DNA methylation status of seven RMER4B copies in *MitoPLD*<sup>-/-</sup> spermatogonia. RMER4B copies that showed a high sequence similarity to the *Rasgrf1* RMER4B copy or to the RMER4B piRNAs were selected and examined. The genomic positions of the copies are indicated at the top. The RMER4B copy in the chr7 piRNA cluster was included in the analysis (third from the right). One of the two RMER4B copies predicted to be targeted by piRNAs (fig. S6) was also included (fourth from the left).

**fig. S8** DNA methylation status of individual L1 and IAP retrotransposon copies in adult liver DNA. The genomic positions of the copies are indicated.

**fig. S9** DNA methylation status of seven RMER4B copies (A) and two IAP copies (B) in adult liver DNA. The maternal and paternal alleles are distinguished using polymorphisms identified between C57BL/6J and JF1 mice. The genomic positions of

the copies are indicated. The RMER4B copy in the chr7 piRNA cluster was included in the analysis (third from the right in (A)). One of the two RMER4B copies predicted to be targeted in fig. S6 was also included (fourth from the left).

**fig. S10** Developmental changes in DNA methylation of RMER4 copies. A primer pair that detected bisulfite-converted products from the bulk of RMER4 (comprising both RMER4A and RMER4B) LTR sequences was used. With this primer pair, RMER4B was more frequently amplified than RMER4A (For example, when adult liver DNA was analyzed, 8 clones were from RMER4A and 78 clones were from RMER4B). To identify the original copy of individual PCR amplicons, the sequences were BLASTed against an in-house database containing all genomic RMER4 sequences where non-CG cytosines were converted to thymine. Then, only CpG sites in the identified RMER4B copies were analyzed (Those in the RMER4A copies were excluded). The percentage of methylated CpG in each stage is shown at the top. Numbers of the CpGs, methylated CpGs, and clones analyzed are shown in a table at the bottom, together with the percentage of methylated CpG.

## Primer Sequences

### Bisulfite Sequencing

(Fig. 1a *Mili*)

|               |                               |
|---------------|-------------------------------|
| Rasgrf1 bisF1 | GAGAGTATGTAAAGTTAGAGTTGTGTTG  |
| Rasgrf1 bisF2 | TAAAGATAGTTTAGATATGGAATTTTGGG |
| Rasgrf1 bisR  | ATAATACAACAACAATAACAATC       |

(Fig. 1a *Miwi2* and *MitoPLD*)

|             |                                      |
|-------------|--------------------------------------|
| Rasgrf1 F K | GGAATTTTGGGGATTTTTTAGAGAGTTTATAAAGT  |
| Rasgrf1 R K | CAAAAACAACAATAATAACAAAAACAAAAACAATAT |

(Fig. S1)

|                 |                               |
|-----------------|-------------------------------|
| H19 bisF1       | GAGTATTTAGGAGGTATAAGAATT      |
| H19 bisR1       | ATCAAAAATAACATAAACCCT         |
| H19 bisF2       | GTAAGGAGATTATGTTTATTTTTGG     |
| H19 bisR2       | CCTCATTAATCCATAACTAT          |
| Dlk1-Gtl2 bisF1 | GTGTTAAGGTATATTATGTTAGTGTTAGG |
| Dlk1-Gtl2 bisF2 | ATATTATGTTAGTGTAGGAAGGATTGTG  |
| Dlk1-Gtl2 bisR  | TACAACCCTCCCTCACTCCAAAAATT    |

(Fig. 1b)

|             |                                            |
|-------------|--------------------------------------------|
| Rasgrf1 F A | GAGGTAAATTTTTTGAGGGGAAGTT                  |
| Rasgrf1 R A | ACTCCACATAAAAAACATAACTTCCCAC               |
| Rasgrf1 F B | GTATGTTATTGTGTTTTTAAGGTTGTTTTTAAA          |
| Rasgrf1 R B | CTAAAAAACCTAACTCATACAAACAAAAAAC            |
| Rasgrf1 F C | TGGTTTTTAGATTAATGATTTTTTAATTGATGATAATTGGGT |
| Rasgrf1 R C | ATTCTATCCTTTAAATAACCAATAAAAAACACAATACT     |

|             |                                              |
|-------------|----------------------------------------------|
| Rasgrfl F D | AGTGTATTGTGTTTTTATTGGTTATTTTAAAGGATAGAAT     |
| Rasgrfl R D | AAACCATCACAAAAACCACACAACCTC                  |
| Rasgrfl F E | GAGTTGTGTGGTTTTTTGTGATGGTTT                  |
| Rasgrfl R E | AAATCCTAAATTTCTAATAAAAAACCAATACCCA           |
| Rasgrfl F F | GTATGTTTTTTTTGAAGTAATGATTATTTTTGTG           |
| Rasgrfl R F | TCCCTAATAACCAAAAAAAAAACATTTTAAATCCCC         |
| Rasgrfl F G | GGGATTTAAAATGTTTTTTTTTGGTTATTAGGGAT          |
| Rasgrfl R G | CTCAAACAACATAAACCTAACATAATAACAAAAT           |
| Rasgrfl F H | GTTATTATGTTAGGTTTATGTTGTTTTGAGTTAATTATTTTA   |
| Rasgrfl R H | ACATTCTCAACAAAAACAATAACCTACCTA               |
| Rasgrfl F I | TGTTTTGTTGAGAATGTATGTGTTAAGAGAGT             |
| Rasgrfl R I | ACCCAACCTACATAAACCAACAAAATAATAATACC          |
| Rasgrfl F J | GGTATTATTTGTTTGGTTTATGTAGAGTTGGGT            |
| Rasgrfl R J | AACTTTATAAACTCTCTAAAAAATCCCCAAAATTCC         |
| Rasgrfl F K | GGAATTTTGGGGATTTTTTAGAGAGTTTATAAAGT          |
| Rasgrfl R K | CAAAAACAACAATAATAACAAAAACAAAAACAATAT         |
| Rasgrfl F L | GTTATTGTTGTTTTTTTTTTTTTATTGTTTTGTTTTAGTTGTTA |
| Rasgrfl R L |                                              |
|             | CAAAAACAATAAAAAAATAAACAATAAAAAACAAAAACAATAC  |
| Rasgrfl F M | TTGTTGTTTTTGTTTTATATTGTTTTTGTTTTAGTTGTTA     |
| Rasgrfl R M | CAAATCTAATCTCCTCATCAAATATCTCCAACCTA          |
| Rasgrfl F N | TAGTTGGAGATATTTTGATGAGGAAGATAGATTTG          |
| Rasgrfl R N | AACCATCCTAATTAACAAAACAAAACCC                 |
| Rasgrfl F O | TTTTTGTTTGTTTTTAGTATGTTAAGATTGTAATGTGAATT    |

|             |                                       |
|-------------|---------------------------------------|
| Rasgrf1 R O | TTCCCAACCACATATAAATTCACATACCTT        |
| Rasgrf1 F P | AAATTTGAATTTGGAATATTTATTAGTTTGGGGGA   |
| Rasgrf1 R P | ACCCTAAAAACAAAACAAATCAAAAACCTCTCT     |
| Rasgrf1 F Q | TTGTTTTTAGGGTTTTTTTGTAAGTTTATTGGA     |
| Rasgrf1 R Q | ATAACCCACATTTATTCAAATACAAAAC          |
| Rasgrf1 F R | TGGGAGGAAGGATTGTGTATATATGGAT          |
| Rasgrf1 R R | ACTTCCAAAACACTCTCTCTACTTTCTCTA        |
| (Fig. S2)   |                                       |
| H19 F A     | TGAATATTTTATGATGGAATTGTTTTTAGATTAGG   |
| H19 R A     | CCTTCCTTACTTAAAAAACTCAAAACACC         |
| H19 F B     | AGTGGGTGGATAATTAGGTGGTTGA             |
| H19 R B     | ACAAACACACCATTCCCATAAAACACTAC         |
| H19 F C     | GAATGGTGTGTTTGTAGGTTGGAT              |
| H19 R C     | AACAAATAAATCTCCTTCTTCTCTTAACTC        |
| H19 F D     | GTTATTGTTGTGGGTGGATTTAAGTTATGATATTG   |
| H19 R D     | ACCACACCAATAAATAACTTACATATAATAACCAACC |
| H19 F E     | AATGGTTGAATTTTAGTTTTTGTTTTTATGGTT     |
| H19 R E     | ACCAATACAATCCCACATACTTTATCATAAAA      |
| H19 F F     | GAATTTAGATAAGTGGTGGAGAAAGAGTTTTGT     |
| H19 R F     | CATATCCATATCCCAACTATATCACTCTTTTATAA   |
| H19 F G     | GATGGGATATATAGATAGGATATATAGATGGGAT    |
| H19 R G     | CATTATCCCCTCCATATAACACCTAC            |
| H19 F H     | ATGGGTATAGAGAGAAAAGAGGGAGT            |
| H19 R H     | CTTTTACAACCAAAAACAAAACAATAATAAAAC     |



|                |                                                |
|----------------|------------------------------------------------|
| IG-DMR F A     | AGGTTAAGATTTAATGATAGAAGGTTAGGTT                |
| IG-DMR R A     | TCTCCATTCTCTCCAACCAATAAAAAC                    |
| IG-DMR F B     | ATATGGATGTATTGTAATATAGGTTAGGTGTT               |
| IG-DMR R B     | AATACACCATAACATAAACATAAAAAATCCACAA             |
| IG-DMR F C     | TTATTATTTTGTGGTTATTTTTATTTAGAGAAAGTTTTATTGTTGT |
| IG-DMR R C     | TCCTTAAAACCCTCAAAAAACCAAATTATAATCTC            |
| IG-DMR F D     | AGGAAGGGTAGTAGGAATTTGTT                        |
| IG-DMR R D     | ATCCAACCCAACCAAATCCATAAAC                      |
| IG-DMR F E     | TGGAGGGTTAAGTGGGTTAGTTTTAAG                    |
| IG-DMR R E     | CCCTAAATCAACTATAAAAAATATATATACCAACAA           |
| Gpr1-Zdbf2 F A | TTTGTTTGGTATGTGTAGAAGATTT                      |
| Gpr1-Zdbf2 R A | ACAAATCATACTATCTACAAAAAAC                      |
| Gpr1-Zdbf2 F B | GATTTAGATTTAGTTGGTTAGTTTTATAT                  |
| Gpr1-Zdbf2 R B | CAAACCTAACTACAAATACCTTTATTACC                  |
| Gpr1-Zdbf2 F C | GAAGTAAGGTAAGTTGTATATAGG                       |
| Gpr1-Zdbf2 R C | AAATCAAACCTACAACTCCAAACTA                      |
| Gpr1-Zdbf2 F D | TAGATGAGAGTTAAGGTATAGTAAATTA                   |
| Gpr1-Zdbf2 R D | ATAAACTCTCCAAAACCAAAAAAAA                      |

(Fig. S7 and S9)

|                          |                                |
|--------------------------|--------------------------------|
| RMER4B chr2:71016632 F   | TTGTAAATAGGAGTAAGATGAAAATGTAGA |
| RMER4B chr2:71016632 R   | AAAAACCACTCCTCCAACCTAAAAAC     |
| RMER4B chr15:89892349 F  | TGGGATAAGTTTGATTTTTTTTTGTTAG   |
| RMER4B chr15:89892349 R  | AAAAACCATCTATATTTTATAAATCACC   |
| RMER4B chr16: 23130024 F | GTTAGTTTTTTGTGGGTTTTTTATA      |

RMER4B chr16:23130024 R AAATAATCTCATACAATAACTTTATTCAA

RMER4B chr2:129208392 F GTTGTGGGGTTGTTTTAGATTGT

RMER4B chr2:129208392 R AAAACCATCTACTCATTCTCCATTC

RMER4B chr7:6568152 F TAATTTGTTTTATGTTTTAGTAGGGGTATG

RMER4B chr7:6568152 R AATTCRAAATCTTTTACCTACACAATCC

RMER4B chr13:114120078 F GTTTATTAGGGGTGTTAAGTTTTTTGG

RMER4B chr13:114120078 R CAAATAACAAAACCTAAAAACTTTAACCAC

RMER4B chr7:128329236 F GAAATTAGTATTTAGTAATTATTAAGTAGT

RMER4B chr7:128329236 R TACTTCAAATTATCCACAACAATA

(Fig. S8)

IAPEY\_LTR chr3:133,335,819 F AGAATGAAGAGAAGTTATTTGATGTTTATA

IAPEY\_LTR chr3:133,335,819 R TCATACCACTATATTAATTATATCCCAAT

IAPEY2\_LTR chr7:63,839,069 F ATTTTAAAATGTTTAAAATGTAAAGTGT

IAPEY2\_LTR chr7:63,839,069 R ATCAAAAATCTTATCCCCTAAAAAC

IAPEY\_LTR chr7:135,704,525 F TGATTGGTGTTTGGGTATTAATTA

IAPEY\_LTR chr7:135,704,525 R CCCAATCCCTAACACTACACAATAC

IAPEY3\_LTR chr1:184,030,968 F TGATTTAGGTTGTAGTAGTATGGGTT

IAPEY3\_LTR chr1:184,030,968 R CTTTATATCAATAAATTACCTAATCCAATC

IAPLTR2\_Mm chr1:121,924,402 F TTTGAAGATGTAAGTAATAAAGTTTTGT

IAPLTR2\_Mm chr1:121,924,402 R ACTCTATATAACCAAACTCAAAAATCC

IAPLTR2b chr2:26,064,096 F GTTTGGGAGTTTTAGTGAGATTTTG

IAPLTR2b chr2:26,064,096 R CCAAACCTTAACAACATACCCCTTTA

IAPLTR1\_Mm chr4:154,520,338 F TATTTTTTATAAAAGAAGATGGGGATATA

IAPLTR1\_Mm chr4:154,520,338 R AAAAATTTAACCTCTATCTCCACTCTC

|                               |                                |
|-------------------------------|--------------------------------|
| IAPLTR1_Mm chr4:154,527,175 F | GTTTTGGAATGAGGGATTTTTTT        |
| IAPLTR1_Mm chr4:154,527,175 R | CATATAACTTCTTATTTTTCCCCCAA     |
| L1Md_A chr15:64632110 F       | GTGTTGGGTAAGATTTTGTGGTA        |
| L1Md_A chr15:64632110 R       | CACAAAACCTCTAAAAACTCATAAAAAAAA |
| L1Md_Gf chr8:89457528 F       | GGTTTTTGTATTATTTTAAATAAAGGTT   |
| L1Md_Gf chr8:89457528 R       | ACCTCAAAAACCTCTATAACTCTTACC    |

(Fig. S9)

|                             |                                |
|-----------------------------|--------------------------------|
| IAPEY3_LTR chr1:184124503 F | TGATTTAGGTTGTAGTAGTATGGGTT     |
| IAPEY3_LTR chr1:184124503 R | CTTTATATCAATAAATTACCTAATCCAATC |
| IAPLTR2b chr2:26097649 F    | GTTTGGGAGTTTTAGTGAGATTTTG      |
| IAPLTR2b chr2:26097649 R    | CCAAACTTAACAACATACCCCTTTA      |

(Fig. S10)

|              |                              |
|--------------|------------------------------|
| RMER4Bbulk F | GGTTGTTTTAGATTGTTTATAGTAGTTG |
| RMER4Bbulk R | CAAATATCTAATTTCTTCTTATTATTCT |

#### **Expression analysis of pit-RNA (Fig. 4A)**

|                   |                             |
|-------------------|-----------------------------|
| Rasgrf1 DMR RNA F | ATACGGGCAACCTTGGGATCATAGGCA |
| Rasgrf1 DMR RNA R | CAAATTCTTACTACACATGGCACA    |
| Oct4 F            | GGAGAAGGTGGAACCAACTC        |
| Oct4 R            | AGATGGTGGTCTGGCTGAAC        |
| GAPDH F           | ATGACATCAAGAAGGTGGTG        |
| GAPDH R           | CATACCAGGAAATGAGCTTG        |

#### **Modified RACE analysis of pit-RNA (Fig. 4B)**

|                                           |                              |
|-------------------------------------------|------------------------------|
| Rasgrf1 Modified RACE 1 <sup>st</sup> PCR | GTCCTCTGACTTGAATAATATGCCCGTT |
| Rasgrf1 Modified RACE 2 <sup>nd</sup> PCR | TACCTTGCCTGGTTTATGTAGAGCTG   |

### **5'RACE analysis of pit-RNA (Fig. 4C)**

|                                    |                                |
|------------------------------------|--------------------------------|
| Rasgrf1 5'RACE 1 <sup>st</sup> PCR | TGCAGAATATGGGGCTGCTTCACATTG    |
| Rasgrf1 5'RACE 2ndPCR              | AATTTTTCTCCATGCTCTAGCAGGCATGTG |

### **q-PCR analysis of pit-RNA (Fig. 4D)**

|                    |                             |
|--------------------|-----------------------------|
| Rasgrf1 DMR RNA F  | ATACGGGCAACCTTGGGATCATAGGCA |
| Rasgrf1 DMR RNA R2 | GGAGGCGTTTATCTGAATAGTCGCAT  |
| Oct4 f             | GGAGAAGGTGGAACCAACTC        |
| Oct4 r             | AGATGGTGGTCTGGCTGAAC        |

### **Expression analysis of pit-RNA (fig. S5A)**

|                   |                      |
|-------------------|----------------------|
| pit-RNA qPCR F    | AGCTGGGCTTACAAACTTCG |
| pit-RNA qPCR R    | GCAAAAAGGAGGCGTTTATC |
| beta-actin qPCR F | ACAGCTTCTTTGCAGCTCCT |
| beta-actin qPCR R | ATCCCACCATCACACCCTG  |

### **Structure of pit-RNA (fig. S5B)**

|             |                           |
|-------------|---------------------------|
| Rasgrf1-1-5 | CCGGA CTCCCTGTTGTAAT      |
| Rasgrf1-1-3 | AGCTTGTGCTCACAGGTTAGA     |
| Rasgrf1-2-5 | CACGGGCTTTTCTCTGTTTT      |
| Rasgrf1-2-3 | GGCCTGGCATAGTAGCAGAA      |
| Rasgrf1-3-5 | CTGCTGCTCAATCGTCTCTCTCTG  |
| Rasgrf1-3-3 | CAACAGAAGCTGAAGGAGACG     |
| Rasgrf1-4-5 | GGAAGCTGGACTTCTGAGTGCTATG |
| Rasgrf1-4-3 | ATACCTGGTAAACAACCTGACTGAA |
| Rasgrf1-5-5 | TGCCTTTCTGTGCCTAGCTT      |
| Rasgrf1-5-3 | GTTTAAACGCACAGGGAGGT      |

Rasgrf1-6-5 AAACAAAGTGCCTGGTTCTCA

Rasgrf1-6-3 GGGATGGAGAAATGGGAAAT

**Cloning of pit-RNA (fig. S5C)**

Rasgrf1-J F ATATGGGGCTGCTTCACATT

Rasgrf1-J R AGCACAGCTCTGGCTTTACA

**Expression of chr7 piRNA precursor (fig. S5D)**

Chr7-piRNA F TGTAAACAGTTGAGGTATTTATTTTGG

Chr7-piRNA R TAGTCACCTTAATGGGAGCAAATC

## References

- S1. R. Anderson, K. Schaible, J. Heasman, C. Wylie, *J Reprod Fertil* **116**, 379 (Jul, 1999).
- S2. T. Yoshimizu *et al.*, *Dev Growth Differ* **41**, 675 (Dec, 1999).
- S3. R. Hirasawa *et al.*, *Genes Dev* **22**, 1607 (Jun 15, 2008).
- S4. H. Jiang, W. H. Wong, *Bioinformatics* **24**, 2395 (Oct 15, 2008).
- S5. T. Watanabe *et al.*, *Nature* **453**, 539 (May 22, 2008).
- S6. Y. Kato *et al.*, *Hum Mol Genet* **16**, 2272 (Oct 1, 2007).
- S7. B. J. Yoon *et al.*, *Nat Genet* **30**, 92 (Jan, 2002).
- S8. S. Kuramochi-Miyagawa *et al.*, *Genes Dev* **22**, 908 (Apr 1, 2008).
- S9. A. A. Aravin *et al.*, *Mol Cell* **31**, 785 (Sep 26, 2008).
- S10. N. Lane *et al.*, *Genesis* **35**, 88 (Feb, 2003).
- S11. S. H. Kim *et al.*, *Biochem Biophys Res Commun* **324**, 58 (Nov 5, 2004).
- S12. R. Holmes, Y. Chang, P. D. Soloway, *Mol Cell Biol* **26**, 9564 (Dec, 2006).
- S13. S. Tomizawa *et al.*, *Development* **138**, 811 (Mar, 2011).
- S14. M. Kaneda *et al.*, *Nature* **429**, 900 (Jun 24, 2004).

figure S1

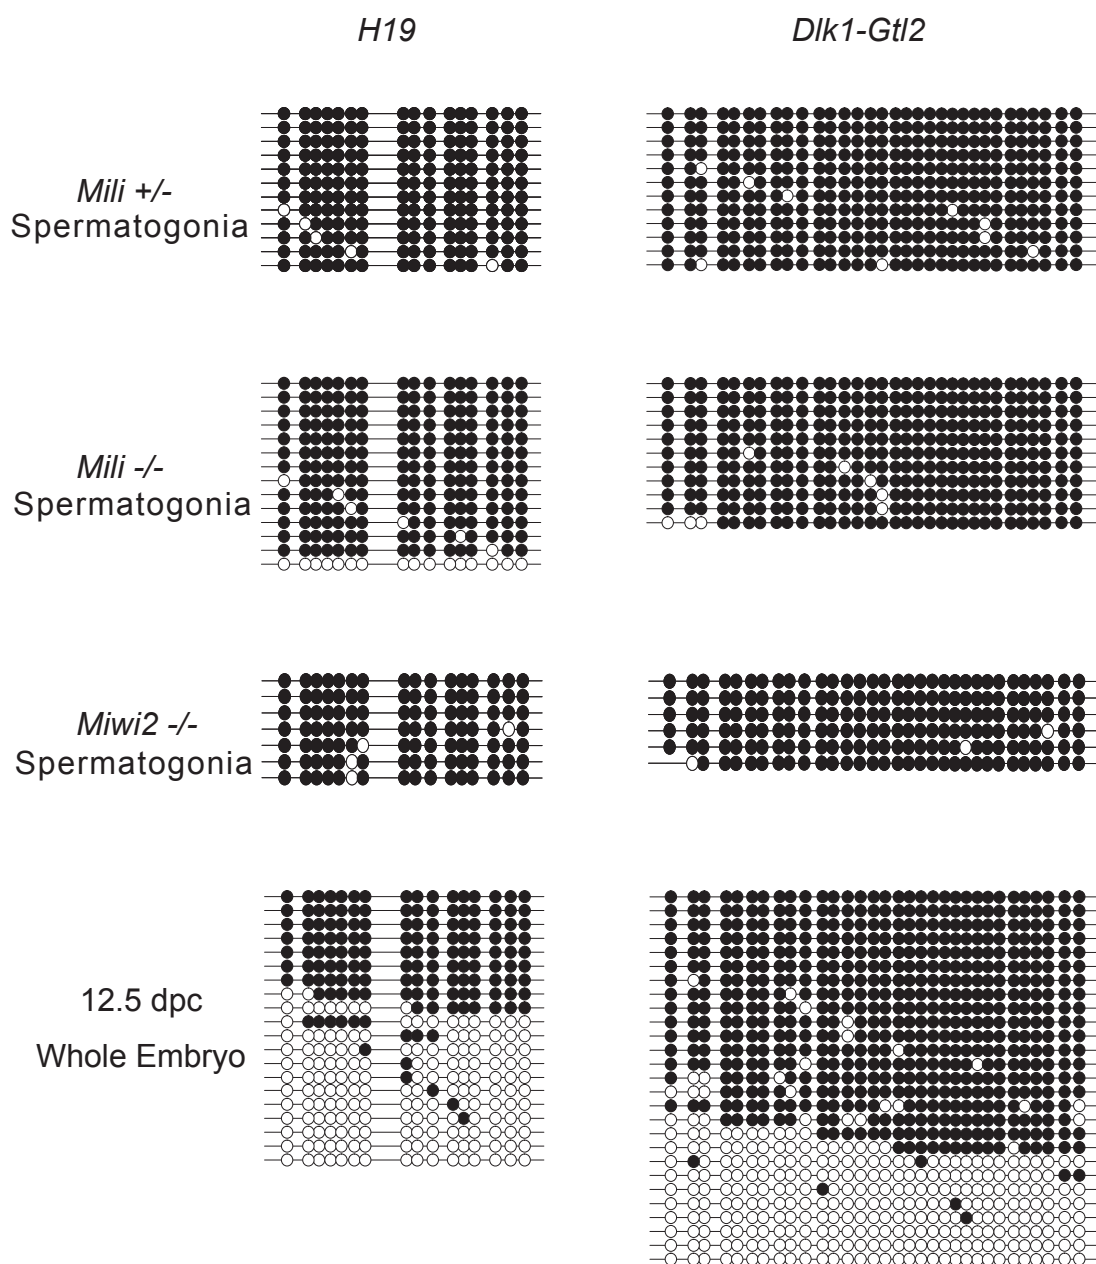

figure S2

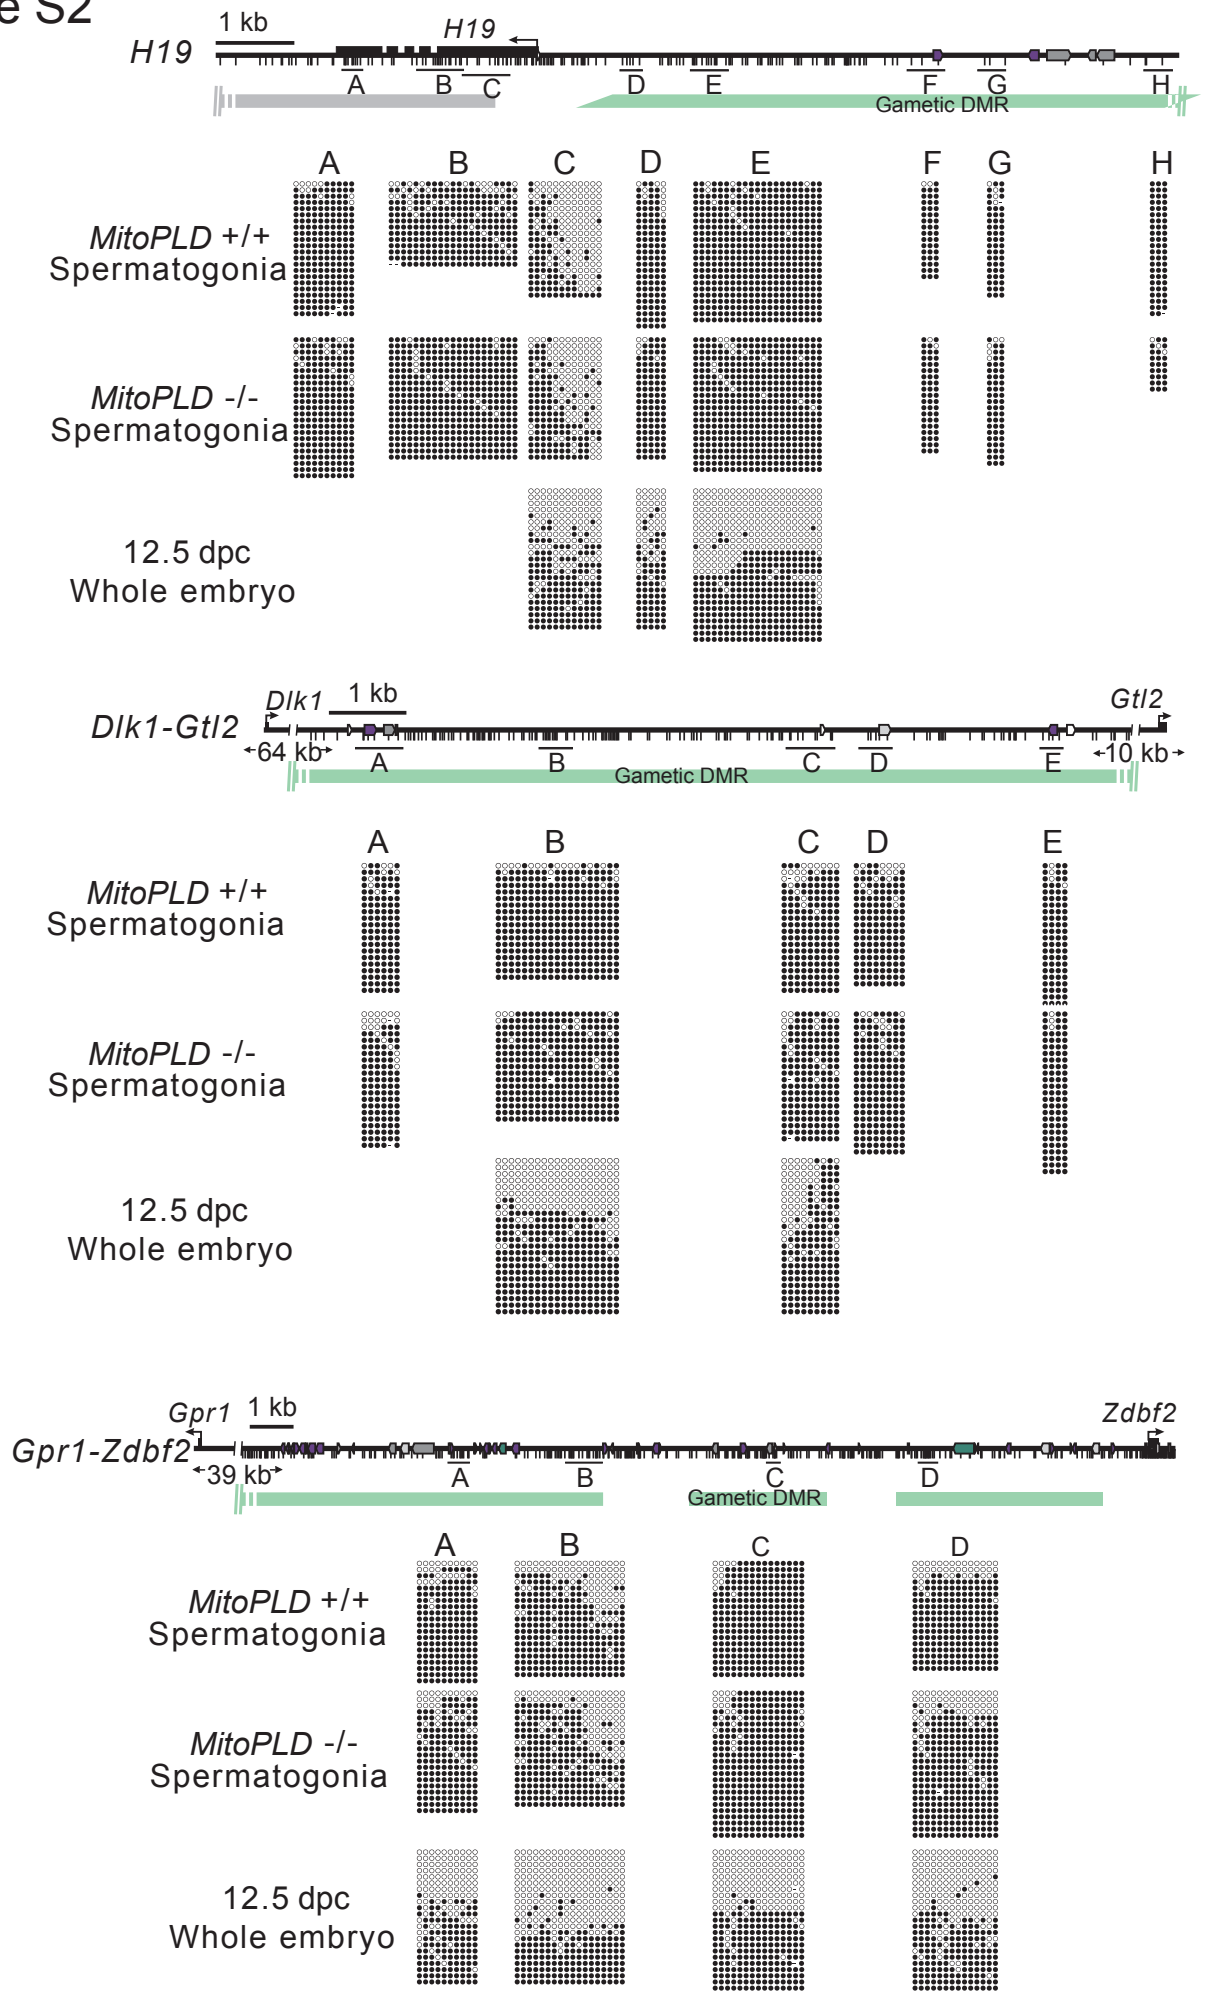



figure S3

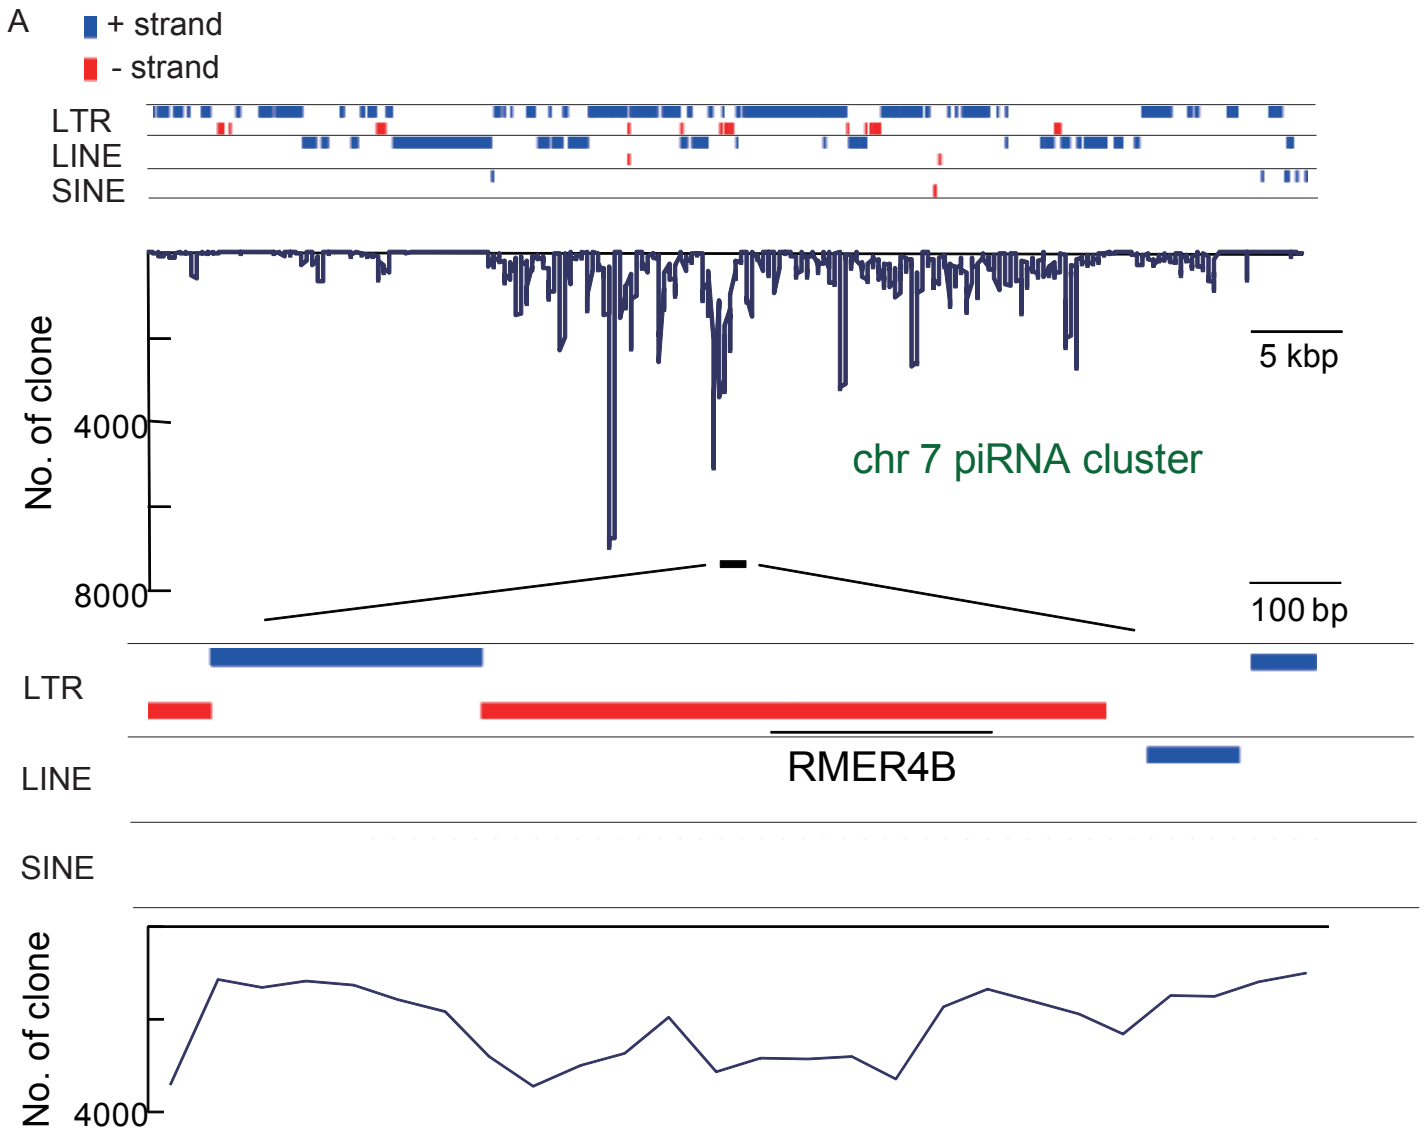

B

|                      |                                                              |
|----------------------|--------------------------------------------------------------|
| Rasgrf1_target_site1 | CTGGCTATAATTTTCTCCATGCTCTAGCAGGCATGTGGTTTTGCCAGCTGAAGATAGTT  |
| Rasgrf1_target_site2 | -----CAGAGCTGTGCTGCTGCCG-CTAAAGATAGTT                        |
| chr7_piRcluster      | CTGACTATAATTTG-CCTCATGTTCTAGCAGGGGCATGGTTTTGCCAGCTGCAGATAGTT |
|                      | ***. .** * ****. **.*****                                    |
| Rasgrf1_target_site1 | TAG-----ATATGGAATTCTGGGAActCTTCAGAGAGTATGTAAG----            |
| Rasgrf1_target_site2 | TAG-----ATATGGAATTCTGGGACTCTTCAGAGAGTTTATAAAG----            |
| chr7_piRcluster      | TCTGTGCAAGCGTGTAACATTTGGAATTCTGGGAActCTTCAGAGAATATATAACCGGTT |
|                      | *. **:*****.*****.**:*.***.                                  |
| Rasgrf1_target_site1 | ----CCAGAGC-----                                             |
| Rasgrf1_target_site2 | ----CCAGCGC-----                                             |
| chr7_piRcluster      | GGGCCCTGAGAGGCATGGTGAGTTGGTGGT                               |
|                      | **:*.*.                                                      |

figure S4

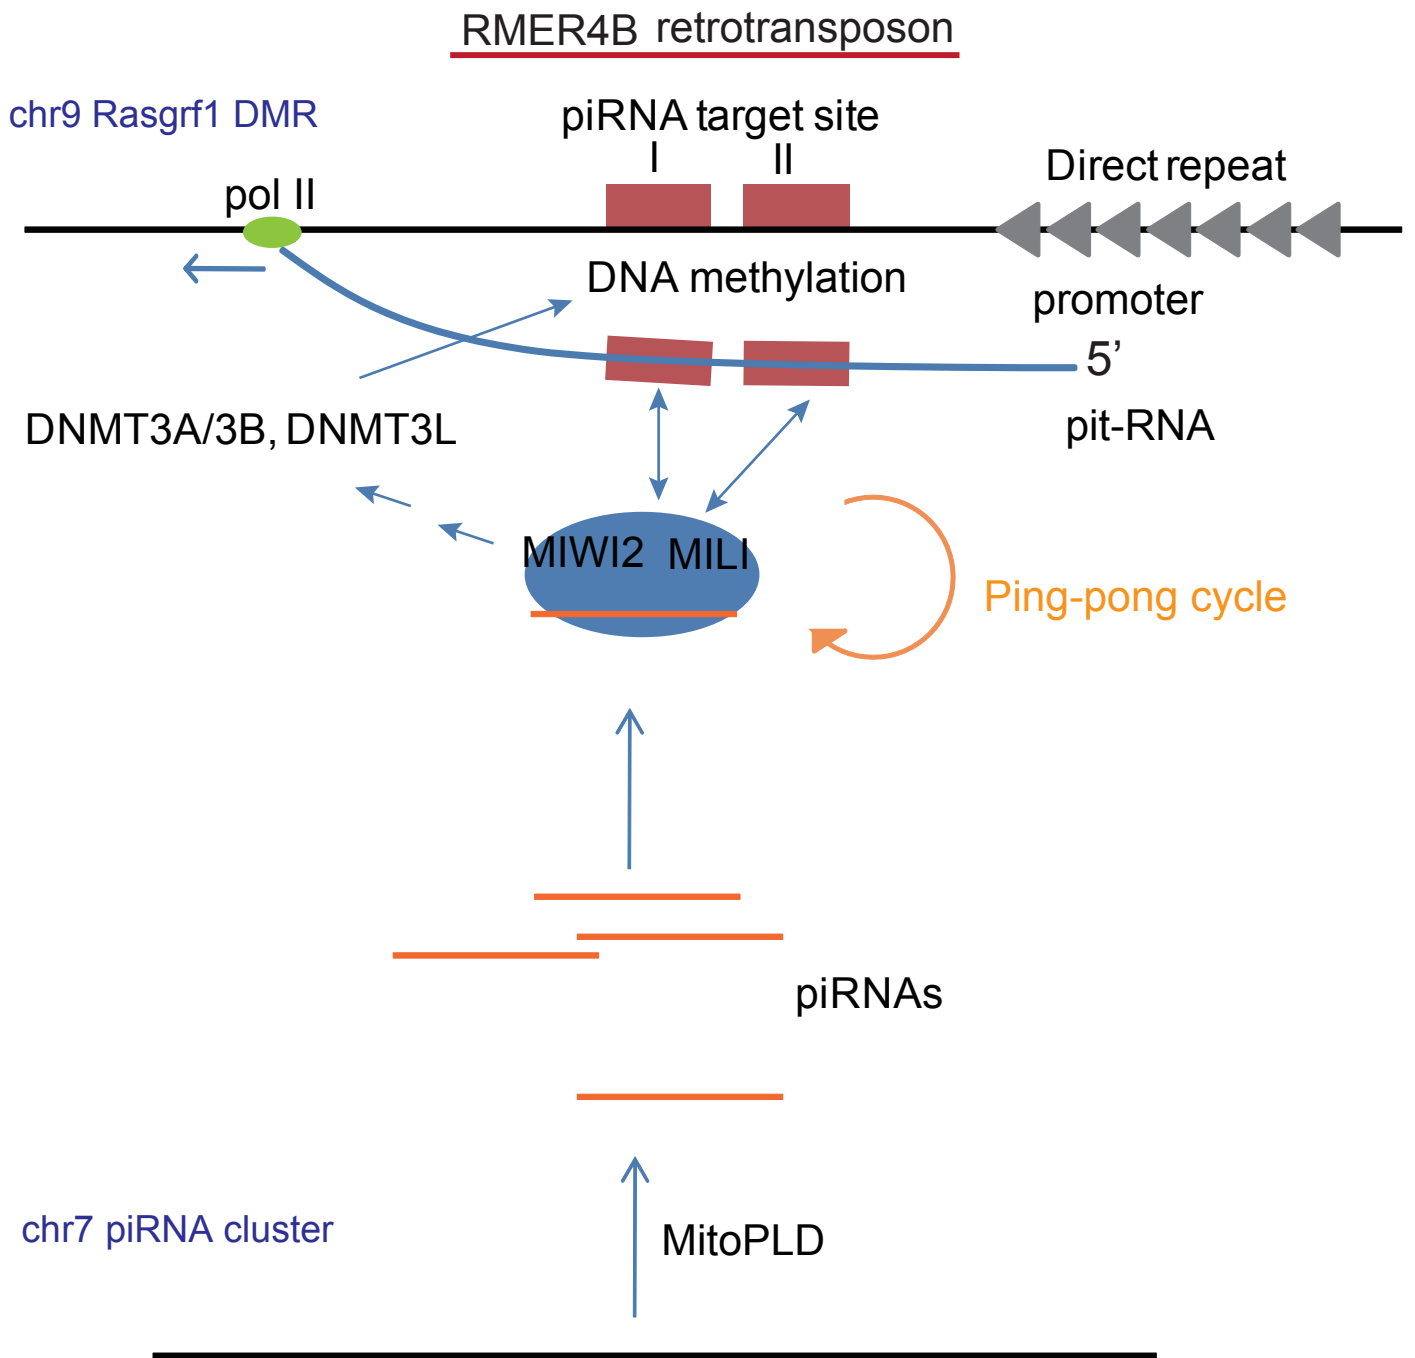



# figure S6

chr2:129208680-129208760 (UCSC 2007)

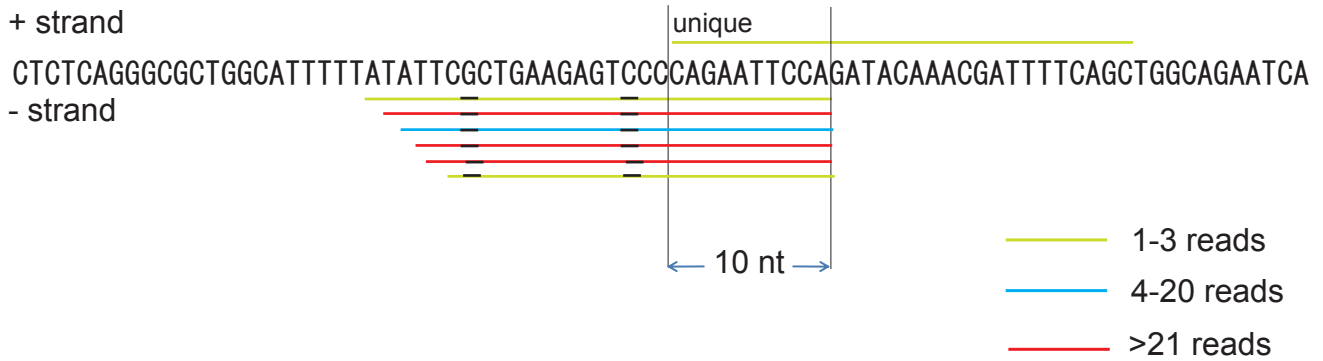

chr11:116358615-116358695 (UCSC 2007)

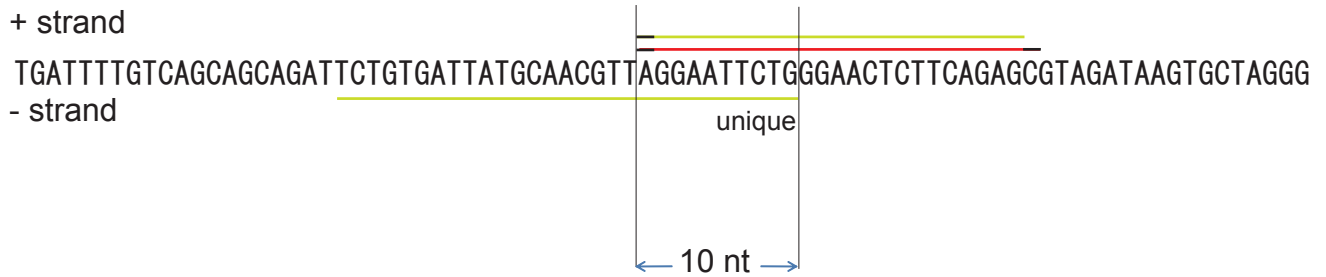

figure S7

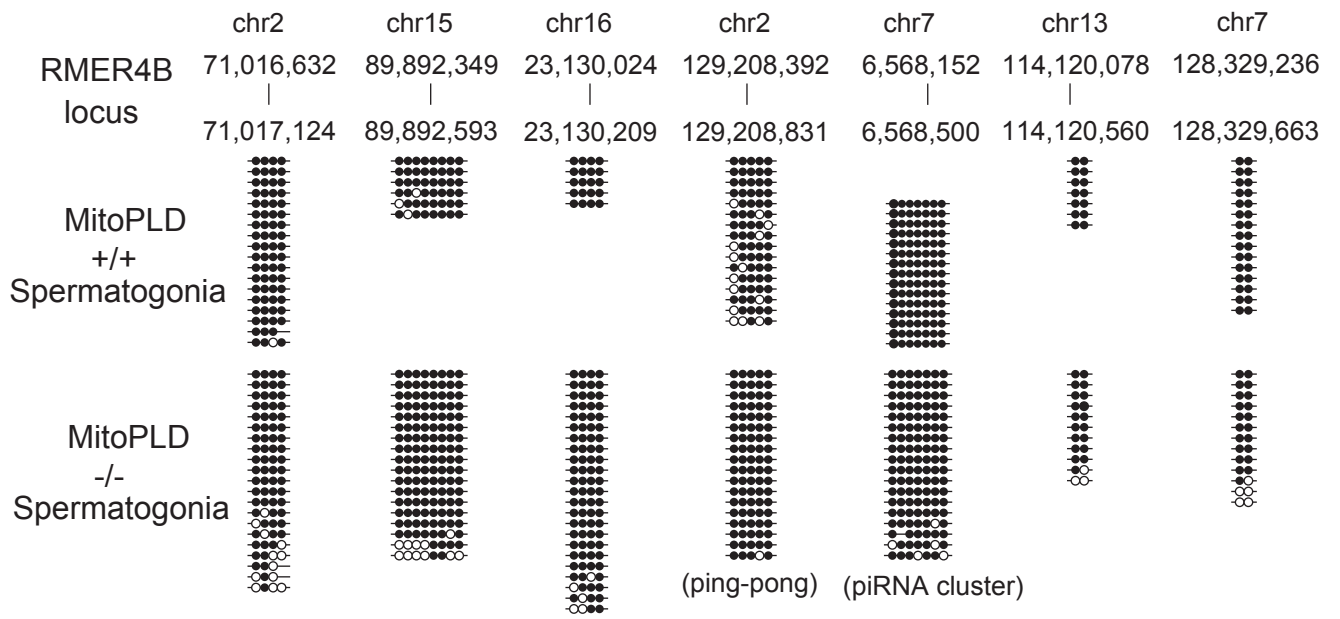

figure S8

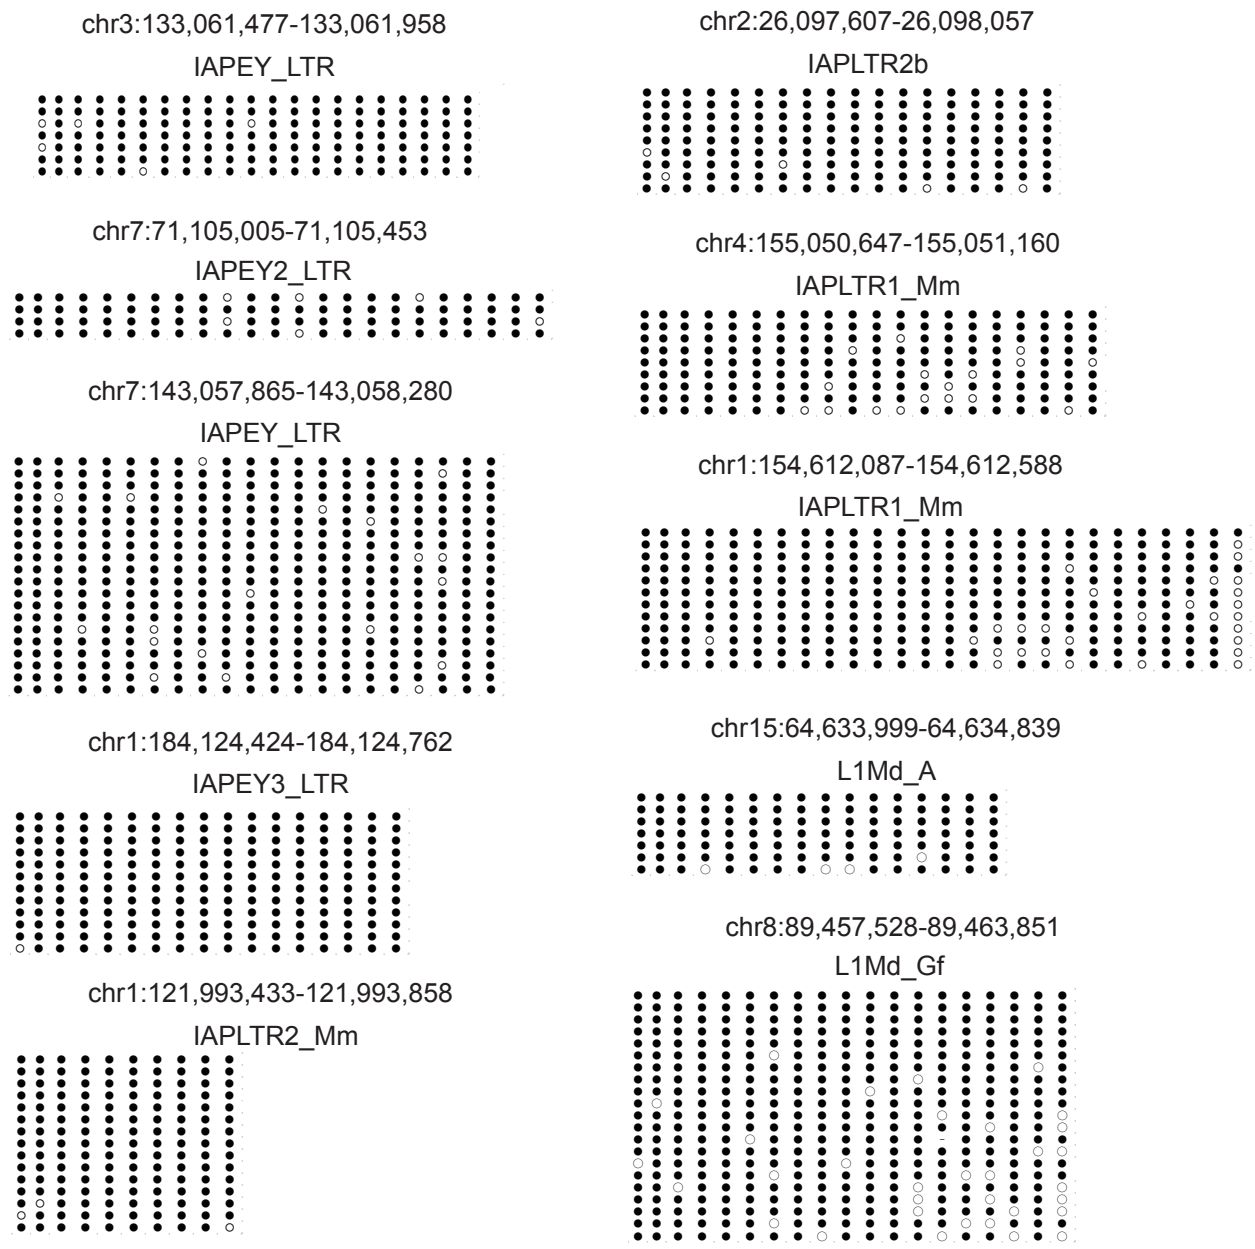

figure S9

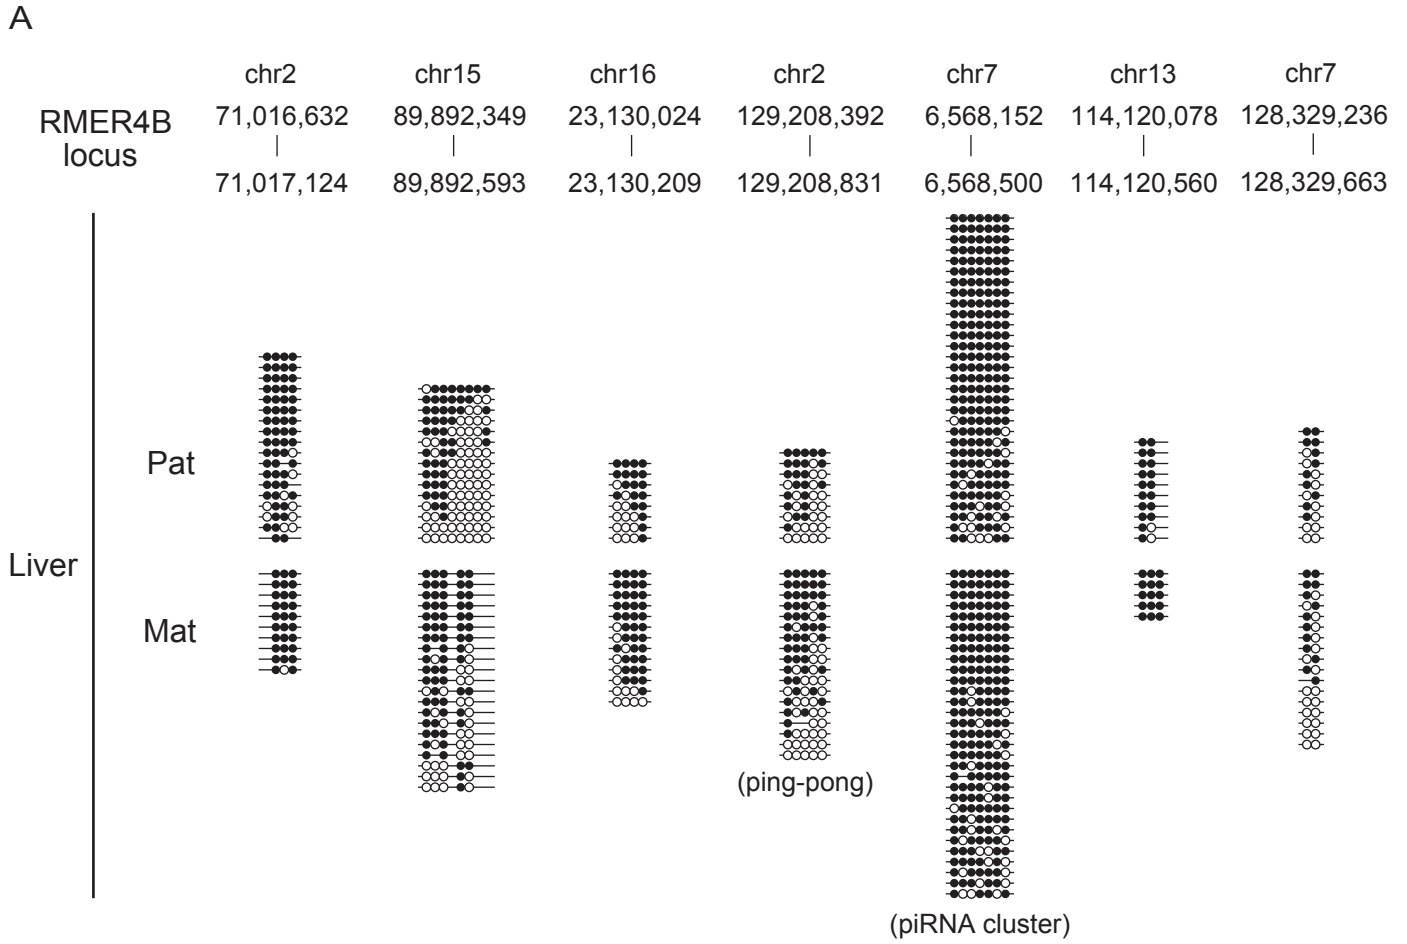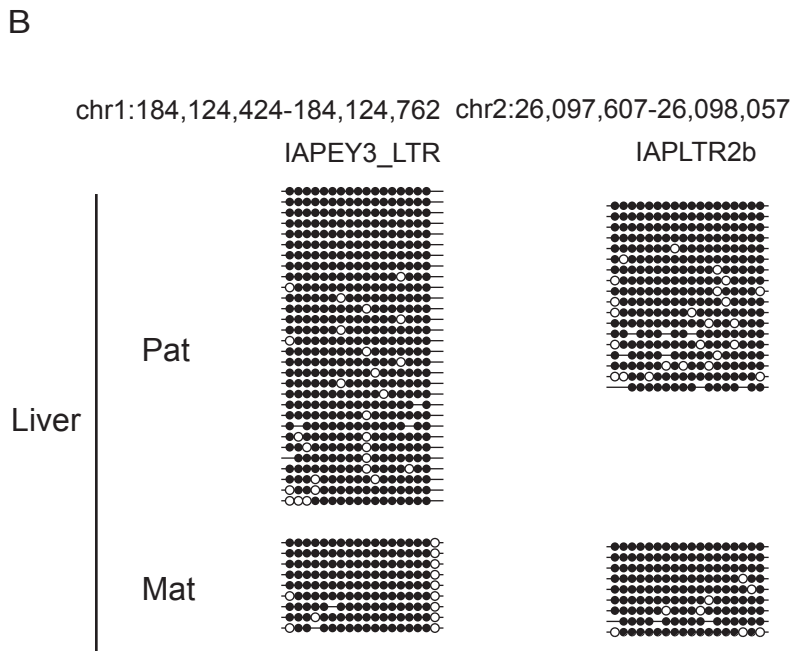

figure S10

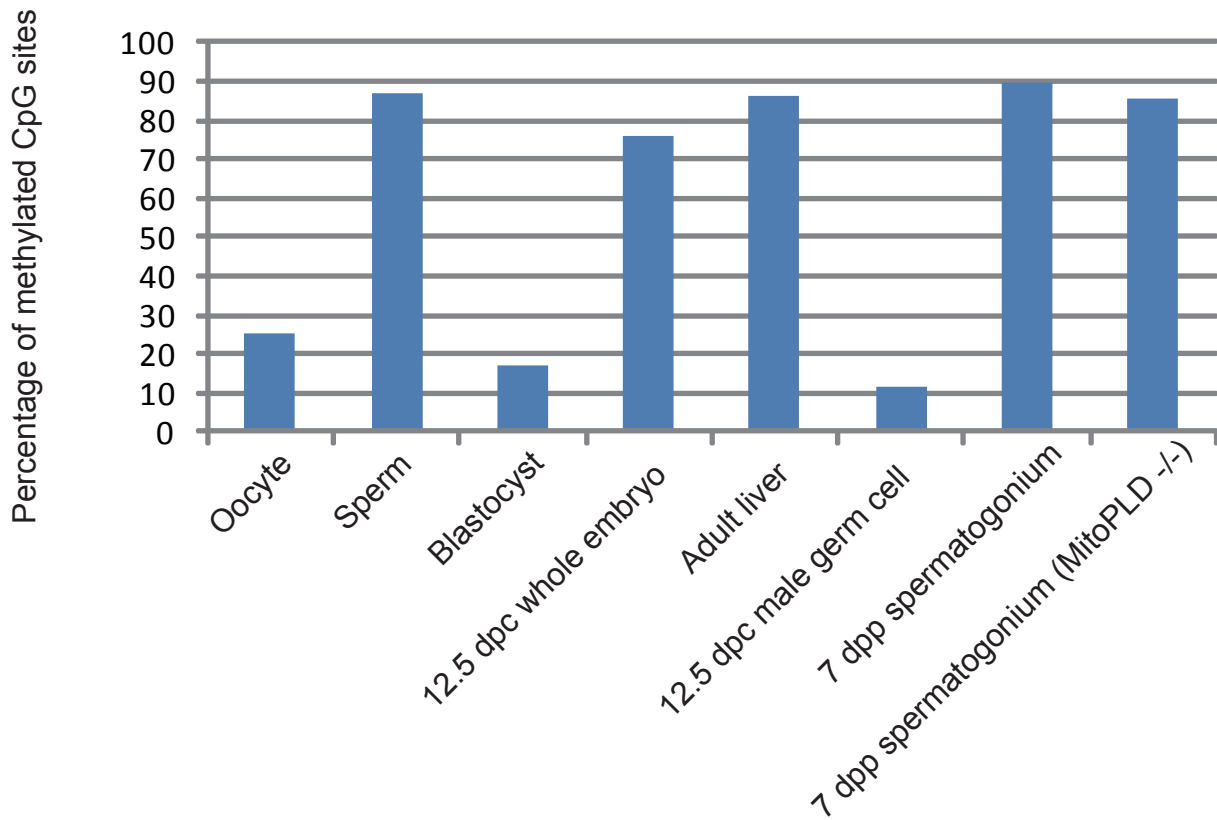

|                                    | No. of total CpGs | No. of methyl CpGs | %    | No. of clones |
|------------------------------------|-------------------|--------------------|------|---------------|
| Oocyte                             | 79                | 20                 | 25.3 | 52            |
| Sperm                              | 112               | 97                 | 86.6 | 64            |
| Blastocyst                         | 47                | 8                  | 17.0 | 36            |
| 12.5 dpc Whole Embryo              | 59                | 45                 | 76.2 | 59            |
| Adult Liver                        | 148               | 128                | 86.4 | 86            |
| 12.5 dpc male germcell             | 176               | 20                 | 11.3 | 128           |
| 7 dpp Spermatogonium               | 67                | 60                 | 89.5 | 58            |
| 7 dpp Spermatogonium (MitoPLD -/-) | 63                | 54                 | 85.7 | 48            |



table S1. Number of small RNAs cloned from 16.5 dpc testes

|                                                                           | <i>Wild-type</i> | <i>Mili</i> -/- | <i>MitoPLD</i> -/- | <i>Miwi2</i> -/- |
|---------------------------------------------------------------------------|------------------|-----------------|--------------------|------------------|
| Total                                                                     | 3133698          | 8734491         | 2634403            | 3991758          |
| Genomic match                                                             | 2083883          | 5029991         | 1628406            | 2474169          |
| Cellular non-coding RNA <sup>1</sup>                                      | 604431           | 3284645         | 903211             | 302992           |
| miRNAs                                                                    | 310134           | 1122346         | 563819             | 655686           |
| Repeat <sup>2</sup> (normalized <sup>3</sup> )                            | 733161(733161)   | 142733(67511)   | 34980(16545)       | 928212(439036)   |
| mRNA (normalized <sup>3</sup> )                                           | 92101(92101)     | 230963(109243)  | 47027(22243)       | 146377(69235)    |
| Others (normalized <sup>3</sup> )                                         | 350208(350208)   | 246934(116797)  | 85107(40254)       | 455074(215246)   |
| <i>Rasgrf1</i> RMER4B hit allowing mismatches (normalized <sup>3</sup> ), | 258(258)         | 6(1.657959)     | 3(1.650179)        | 381(180.2098)    |
| <i>Rasgrf1</i> RMER4B unique hit (normalized <sup>3</sup> )               | 6(6)             | 2(0.552653)     | 0(0)               | 6(2.83795)       |

<sup>1</sup> This class includes rRNA, tRNA, snRNA, snoRNA, scRNA, srpRNA and RNA (RepeatMasker annotation)

<sup>2</sup> A majority of this class is piRNAs

<sup>3</sup> The number of clones is normalized using that of miRNAs

table S2. Unique small RNAs that hit the *Rarf1* DMR<sup>1</sup>

| sequence                        | length | strand | No. of clone | chr  | start    | end      |
|---------------------------------|--------|--------|--------------|------|----------|----------|
| TTTAAAAATCACAGACAACAGAAGCTGAA   | 29     | -      | 1            | chr9 | 89772369 | 89772397 |
| TTACAACAGGGAAGTCCGGGATTTG       | 25     | -      | 1            | chr9 | 89772908 | 89772932 |
| AGCAGAATTAGTGACGATTACAACAGGG    | 28     | -      | 1            | chr9 | 89772922 | 89772949 |
| TTCAATGGCAACAAGGACCAGGATATCAATC | 31     | -      | 1            | chr9 | 89773600 | 89773630 |
| TAGCAGAACAGATCAAACAAGCAGGCA     | 27     | -      | 1            | chr9 | 89774080 | 89774106 |
| TAAACCTCTTAGCAGAACAGATCAAACAA   | 30     | -      | 1            | chr9 | 89774087 | 89774116 |
| AAGGAGGCGTTTATCTGAATAGTCGCA     | 27     | -      | 1            | chr9 | 89774163 | 89774189 |
| CAGAATTCCATATCTAAACTATCTTCAGC   | 29     | -      | 1            | chr9 | 89774367 | 89774395 |
| TGGCTTTACATACTCTCTGAAGAGTTCC    | 28     | -      | 2            | chr9 | 89774396 | 89774423 |
| AGCAGCACAGCTCTGGCTTTACATACTCTC  | 30     | -      | 1            | chr9 | 89774407 | 89774436 |
| CAGAATTCCATATCTAAACTATCTTTA     | 27     | -      | 2            | chr9 | 89774442 | 89774468 |
| TCGGCAATGGCTGGGATGATGGCAGAAA    | 28     | -      | 1            | chr9 | 89776553 | 89776580 |
| TCGGCAATGGCTGGGATGATGGCAGA      | 26     | -      | 1            | chr9 | 89776555 | 89776580 |
| AAACAAATATTTATCATGATCAAACGG     | 27     | -      | 1            | chr9 | 89776839 | 89776865 |
| TAGGAAAGTTAAACAAAGCAAAAACGAATA  | 30     | -      | 1            | chr9 | 89776928 | 89776957 |
| TAGAAACAGACAGGAGGATTATGAAT      | 26     | -      | 1            | chr9 | 89777201 | 89777226 |
| TAATACTGTAGCTTTGAAAACAAACAGA    | 28     | -      | 1            | chr9 | 89777783 | 89777810 |
| TACTGTAGCTTTGAAAACAAACA         | 23     | -      | 1            | chr9 | 89777785 | 89777807 |
| TGTAGCGCTATAACAATTCTGGCTCCC     | 27     | +      | 1            | chr9 | 89778319 | 89778345 |

<sup>1</sup>Coordinates: chr9: 89769659-89779158 (mm9)

table S3. Origin of small RNAs that hit the *Rasgrf1* RMER4B sequence with up to 2 mismatches

| Sequence                           | length | No. of clone | No. of genomic match | chr7 piRNA cluster | <i>Rasgrf1</i> | RMER4B     |
|------------------------------------|--------|--------------|----------------------|--------------------|----------------|------------|
| TGGAATTCTGGGA ACTCTTCAGAGAATATA    | 30     | 18           | 1                    | unique hit         |                |            |
| TGGAATTCTGGGA ACTCTTCAGAGAA        | 26     | 88           | 1                    | unique hit         |                |            |
| TGGAATTCTGGGA ACTCTTCAGAGAATA      | 28     | 50           | 1                    | unique hit         |                |            |
| TGGAATTCTGGGA ACTCTTCAGAGAATAT     | 29     | 1            | 1                    | unique hit         |                |            |
| TGGAATTCTGGGA ACTCTTCAGAGA         | 25     | 35           | 4                    | hit <sup>1</sup>   |                |            |
| TTGGAATTCTGGGA ACTCTTCAGAGA        | 26     | 16           | 2                    | hit <sup>1</sup>   |                |            |
| TGGAATTCTGGGA ACTCTTCAGAGAAT       | 27     | 15           | 1                    | unique hit         |                |            |
| TTGGAATTCTGGGA ACTCTTCAGAGAAT      | 28     | 3            | 1                    | unique hit         |                |            |
| TTTGG AATTCTGGGA ACTCTTCAGAGAA     | 28     | 1            | 1                    | unique hit         |                |            |
| TTGGAATTCTGGGA ACTCTTCAGAGAA       | 27     | 11           | 1                    | unique hit         |                |            |
| TGCCAGCTGCAGATAGTTTC               | 20     | 1            | 302                  |                    |                |            |
| AGCAGCACAGCTCTGGCTTTACATACTCTC     | 30     | 1            | 1                    |                    |                | unique hit |
| TAGGAATTCTGGGA ACTCTTCAGAGCGTA     | 29     | 1            | 1                    | unique hit         |                |            |
| TGGAATTCTGGGA ACTCTTCAGAGT         | 25     | 1            | 2                    |                    |                |            |
| TGGAATTCTGGGA ACTCTTCAGAGAATATATAA | 33     | 1            | 1                    | unique hit         |                |            |
| CAGAATCCATATCTAAACTATCTTCAGC       | 29     | 1            | 1                    |                    |                | unique hit |
| CAGAATCCATATCTAAACTATCTTTA         | 27     | 2            | 1                    |                    |                | unique hit |
| TGGAATTCTGGGA ACTCTTCAGAG          | 24     | 1            | 18                   | hit <sup>1</sup>   |                |            |
| TGGAATTCTGGGGACTTTTCAGAGGGT        | 27     | 2            | 74                   |                    |                |            |
| CATTTGGAATTCTGGGA ACTCTTCAGAGA     | 29     | 1            | 1                    | unique hit         |                |            |
| TTCTGGGA ACTTTTCAGAGGGTATG         | 25     | 1            | 12                   |                    |                |            |
| TGGCTTTACATACTCTCTGAAGAGTTCC       | 28     | 2            | 1                    |                    |                | unique hit |
| TTGGAATTCTGGGA ACTCTTCAGAGAATA     | 29     | 2            | 1                    | unique hit         |                |            |
| TCTGGGA ACTCTTCAGAGAAT             | 21     | 1            | 1                    | unique hit         |                |            |
| GAATTCTGGGA ACTCTTCAGAGAATATATAA   | 31     | 1            | 1                    | unique hit         |                |            |
| TGGAATTCTGGGGACTTTTCAGAGG          | 25     | 1            | 122                  |                    |                |            |

<sup>1</sup>This represents a non-unique mapping with a perfect sequence match.
